# Supplementary material for: A conserved LDL-receptor motif regulates corin and CD320 membrane targeting in polarized renal epithelial cells
Source: eLife. 2020 Nov 2;9:e56059. doi: 10.7554/eLife.56059 (PMC7605860; doi:10.7554/eLife.56059)
Supplement: Figure 2—figure supplement 1—source data 1. [file elife-56059-fig2-figsupp1-data1.xlsx]

## Sheet: Fig2-fig. suppl. 1A-source dat 
Figure 2-fig. suppl. 1A
WT	ΔCT	ΔFZ1-SR
0.0270479	0.000648508	0.453683
0.0257758	0.0995076	0.566388
0.00592953	0.0639468	0.467963
0.0746559	0.00988405	0.460342
0.0929916	0.116922	0.457542
