# Supplementary material for: A conserved LDL-receptor motif regulates corin and CD320 membrane targeting in polarized renal epithelial cells
Source: eLife. 2020 Nov 2;9:e56059. doi: 10.7554/eLife.56059 (PMC7605860; doi:10.7554/eLife.56059)
Supplement: Figure 2—figure supplement 1—source data 2. [file elife-56059-fig2-figsupp1-data2.xlsx]

## Sheet: Fig2-fig.suppl.1B-source data
Figure 2-fig. suppl. 1B
WT	ΔFZ1	ΔR1-4	ΔR45	ΔFZ2	ΔR6-8	ΔR67	ΔR78	ΔR8
0.114245	0.0117257	0.0340126	0.21668	0.0133352	0.462492	0.0706364	0.499465	0.551857
0.0364292	0.0524393	0.0175898	0.0392339	0.00451724	0.485297	0.0871459	0.484834	0.420869
0.150634	0.0177527	0.0720421	0.0293851	0.000333961	0.401528	0.079713	0.458087	0.328753
0.114388	0.00328329	0.03456	0.0498531	0.000242324	0.514884	0.0889288	0.416248	0.470479
0.146978	0.000750047	0.0814456	0.0389039	0.0152069	0.273229	0.0724906	0.51295	0.435765
