# Supplementary material for: A conserved LDL-receptor motif regulates corin and CD320 membrane targeting in polarized renal epithelial cells
Source: eLife. 2020 Nov 2;9:e56059. doi: 10.7554/eLife.56059 (PMC7605860; doi:10.7554/eLife.56059)
Supplement: Figure 2—figure supplement 2—source data 1. [file elife-56059-fig2-figsupp2-data1.xlsx]

## Sheet: Fig2-fig.suppl.2C-source data
Figure 2-fig. suppl. 2C
WT	N567Q	N651Q	N697Q	N761Q	N1022Q
0.00453324	0.0356295	0.0133527	0.0107288	0.00852936	0.0276846
0	0.00352819	0.0122139	0.00832073	0.000159297	0.000601186
0.00725627	0.0244635	0.0154698	0.0243684	0.0103217	0.0100631
0.000527621	0.0160319	0.0205576	0.00762101	0.02214	0.0320882
0.029968	0.000276689	0.0736842	0.0311477	0.0139846	0.0098817
