# Supplementary material for: A conserved LDL-receptor motif regulates corin and CD320 membrane targeting in polarized renal epithelial cells
Source: eLife. 2020 Nov 2;9:e56059. doi: 10.7554/eLife.56059 (PMC7605860; doi:10.7554/eLife.56059)
Supplement: Figure 3—figure supplement 1—source data 1. [file elife-56059-fig3-figsupp1-data1.xlsx]

## Sheet: Fig3-fig.suppl.1C-source data
Figure 3-fig. suppl. 1C
WT	ΔR78	G590H	A595R/R598W	D608S	E612W
0.0653058	0.550341	0.47736	0.497632	0.0760529	0.379783
0	0.367814	0.529128	0.445679	0	0.39997
0	0.460482	0.527505	0.464796	0.00447734	0.489372
0.0828107	0.407186	0.429383	0.526977	0.00225891	0.430068
0.00238092	0.433282	0.420962	0.471419	0.00643516	0.485959
