# Supplementary material for: A conserved LDL-receptor motif regulates corin and CD320 membrane targeting in polarized renal epithelial cells
Source: eLife. 2020 Nov 2;9:e56059. doi: 10.7554/eLife.56059 (PMC7605860; doi:10.7554/eLife.56059)
Supplement: Figure 3—figure supplement 1—source data 2. [file elife-56059-fig3-figsupp1-data2.xlsx]

## Sheet: Fig3-fig.suppl.1D-source data
Figure 3-fig. suppl. 1D
WT	S683D
0.00357072	0.518975
0	0.575442
0	0.407531
0	0.404983
0.0160715	0.373661
