# Supplementary material for: A conserved LDL-receptor motif regulates corin and CD320 membrane targeting in polarized renal epithelial cells
Source: eLife. 2020 Nov 2;9:e56059. doi: 10.7554/eLife.56059 (PMC7605860; doi:10.7554/eLife.56059)
Supplement: Figure 4—figure supplement 1—source data 1. [file elife-56059-fig4-figsupp1-data1.xlsx]

## Sheet: Fig4-fig.suppl.1B-source data
Figure 4-fig. suppl. 1B
WT	D682A	S683A	S684A	D685A	E686A
0.076757	0.556794	0.068523	0.429704	0.383627	0.430931
0.024248	0.560454	0.0598	0.552651	0.52541	0.494204
0.028736	0.393267	0.019754	0.55656	0.502044	0.47621
0.00761	0.438508	0.000982	0.487628	0.636735	0.470941
0.000887	0.580573	0	0.414464	0.516665	0.315355
