# Supplementary material for: A conserved LDL-receptor motif regulates corin and CD320 membrane targeting in polarized renal epithelial cells
Source: eLife. 2020 Nov 2;9:e56059. doi: 10.7554/eLife.56059 (PMC7605860; doi:10.7554/eLife.56059)
Supplement: Figure 4—figure supplement 1—source data 2. [file elife-56059-fig4-figsupp1-data2.xlsx]

## Sheet: Fig4-fig.suppl.1C-source data
Figure 4-fig. suppl. 1C
WT	S684A	ML6/S684A	ML7/S684A
0.07129	0.46319	0.032516	0.00039
0.073772	0.512943	0	0.001301
0.000353	0.480908	0.060947	0
0	0.43481	0.006814	0.004507
0.041833	0.490999	0	0.004509
