# Supplementary material for: A conserved LDL-receptor motif regulates corin and CD320 membrane targeting in polarized renal epithelial cells
Source: eLife. 2020 Nov 2;9:e56059. doi: 10.7554/eLife.56059 (PMC7605860; doi:10.7554/eLife.56059)
Supplement: Figure 7—figure supplement 1—source data 1. [file elife-56059-fig7-figsupp1-data1.xlsx]

## Sheet: Fig7-fig.suppl.1A-source data
Figure 7-fig. suppl. 1A
WT	D160A	S161A	S162A	D163A	D164A
0.041091	0.42621	0.016211	0.478161	0.361345	0.383698
0.006104	0.425664	0.020486	0.433344	0.514337	0.37468
0.014594	0.402371	0.039728	0.336274	0.506265	0.344698
0.008812	0.403915	0.007611	0.536354	0.376625	0.409382
0.001575	0.399376	0.040332	0.535258	0.301078	0.377366
