# Supplementary material for: A conserved LDL-receptor motif regulates corin and CD320 membrane targeting in polarized renal epithelial cells
Source: eLife. 2020 Nov 2;9:e56059. doi: 10.7554/eLife.56059 (PMC7605860; doi:10.7554/eLife.56059)
Supplement: Figure 7—figure supplement 1—source data 2. [file elife-56059-fig7-figsupp1-data2.xlsx]

## Sheet: Fig7-fig.suppl.1B-source data
Figure 7-fig. suppl. 1B
WT	S162A	ML1/S162A
0.017064	0.41947	0.007392
0.028743	0.506371	0.021752
0.015494	0.320135	0.014455
0.003732	0.500074	0.026934
0.00894	0.489785	0.063934
