# Supplementary material for: A conserved LDL-receptor motif regulates corin and CD320 membrane targeting in polarized renal epithelial cells
Source: eLife. 2020 Nov 2;9:e56059. doi: 10.7554/eLife.56059 (PMC7605860; doi:10.7554/eLife.56059)
Supplement: Figure 8—figure supplement 1—source data 1. [file elife-56059-fig8-figsupp1-data1.xlsx]

## Sheet: Fig8-fig.suppl.1A-source data
Figure 8-fig. suppl. 1A
Corin/Rab11a		Corin/DNRab11a		Corin/Rab11b		Corin/DNRab11b
0.011656		0.507982		0.123007		0.039748
0.037017		0.472873		0.053021		0.019116
0		0.470759		0.001714		0.052885
0.010678		0.435035		0.018687		0.000479
