# Supplementary material for: A conserved LDL-receptor motif regulates corin and CD320 membrane targeting in polarized renal epithelial cells
Source: eLife. 2020 Nov 2;9:e56059. doi: 10.7554/eLife.56059 (PMC7605860; doi:10.7554/eLife.56059)
Supplement: Figure 8—figure supplement 1—source data 2. [file elife-56059-fig8-figsupp1-data2.xlsx]

## Sheet: Fig8-fig.suppl.1C-source data
Figure 8-fig. suppl. 1C
Corin				CD320
NC	shRab11a1	shRab11a2		NC	shRab11a1	shRab11a2
0.032463	0.412034	0.474654		0.054579	0.530321	0.428604
0.02414	0.303183	0.254775		0.05444	0.51639	0.522229
0.044362	0.417089	0.496726		0.023222	0.609128	0.520636
0.11633	0.437588	0.451051		0.008828	0.359016	0.309458
