# Supplementary material for: A conserved LDL-receptor motif regulates corin and CD320 membrane targeting in polarized renal epithelial cells
Source: eLife. 2020 Nov 2;9:e56059. doi: 10.7554/eLife.56059 (PMC7605860; doi:10.7554/eLife.56059)
Supplement: Figure 8—figure supplement 2—source data 1. [file elife-56059-fig8-figsupp2-data1.xlsx]

## Sheet: Fig8-fig.suppl.2A-source data
Figure 8-fig. suppl. 2A
shNC	shRab11b1	shRab11b2
1.00234	0.221539	0.279772
1.05808	0.237318	0.246121
0.952752	0.222617	0.237148
1.01416	0.24969	0.249909
