# Supplementary material for: A conserved LDL-receptor motif regulates corin and CD320 membrane targeting in polarized renal epithelial cells
Source: eLife. 2020 Nov 2;9:e56059. doi: 10.7554/eLife.56059 (PMC7605860; doi:10.7554/eLife.56059)
Supplement: Figure 8—figure supplement 2—source data 2. [file elife-56059-fig8-figsupp2-data2.xlsx]

## Sheet: Fig8-fig.suppl.2D-source data
Figure 8-fig. suppl. 2D
Corin				CD320
NC	shRab11b1	shRab11b2		NC	shRab11b1	shRab11b2
0.083679	0	0.016414		0.049474	0.030484	0.061861
0.037127	0.114619	0.000153		0.006375	0.059196	0.035639
0	0.002983	0		0.006263	0.031282	0.045596
0.039646	0	0.01828		0.008793	0.038035	0.0362
