# Supplementary material for: A conserved LDL-receptor motif regulates corin and CD320 membrane targeting in polarized renal epithelial cells
Source: eLife. 2020 Nov 2;9:e56059. doi: 10.7554/eLife.56059 (PMC7605860; doi:10.7554/eLife.56059)
Supplement: Figure 8—source data 1. [file elife-56059-fig8-data1.xlsx]

## Sheet: Figure 8B-source data 1
Figure 8B
shNC	shRab11a1	shRab11a2
0.967149	0.266487	0.416158
0.649369	0.32054	0.322235
0.878005	0.136903	0.356352
1.57961	0.216845	0.24838
1.14808	0.263291	0.266985
